# Supplementary material for: Dependence On Glycolysis Sensitizes BRAF-mutated Melanomas For Increased Response To Targeted BRAF Inhibition
Source: Sci Rep. 2017 Feb 16;7:42604. doi: 10.1038/srep42604 (PMC5311997; doi:10.1038/srep42604)
Supplement: Supplemental Figures [file srep42604-s1.pdf]

## Supplemental Figures and Figure Legends

Title: Dependence On Glycolysis Sensitizes BRAF-mutated Melanomas For Increased Response To Targeted BRAF Inhibition

Authors: Keisha N. Hardeman<sup>1,2</sup>, Chengwei Peng<sup>1,2</sup>, Bishal B. Paudel<sup>2,5</sup>, Christian T. Meyer<sup>2</sup>, Thong Luong<sup>4</sup>, Darren R. Tyson<sup>1,2</sup>, Jamey D. Young<sup>3</sup>, Vito Quaranta<sup>1,2</sup>, and Joshua P. Fessel<sup>1,4,\*</sup>

Author Affiliations:

<sup>1</sup>Department of Cancer Biology, Vanderbilt University School of Medicine, 2220 Pierce Avenue, Nashville, TN 37232

<sup>2</sup>Center for Cancer Systems Biology at Vanderbilt, Vanderbilt University School of Medicine, 2220 Pierce Avenue, Nashville, TN 37232

<sup>3</sup>Departments of Chemical Biomolecular Engineering, and Molecular Physiology & Biophysics, Vanderbilt University, Nashville, TN 37232

<sup>4</sup>Departments of Medicine & Pharmacology, Division of Allergy, Pulmonary, and Critical Care Medicine, Vanderbilt University School of Medicine, 21<sup>st</sup> Avenue South, Nashville, TN 37232

<sup>5</sup>Chemical and Physical Biology Graduate Program, Vanderbilt University, Nashville, TN, USA 37232

Supplemental Table 1

**Table 1. BRAF-Mutated Melanoma Cell Lines Exhibit Heterogeneity**

|                  | <b>Relevant Mutation/Biology</b> |                   |                    | <b>IC50 Metrics</b> |
|------------------|----------------------------------|-------------------|--------------------|---------------------|
| <b>Cell Line</b> | <b>BRAF Mutation</b>             | <b>P53 Status</b> | <b>PTEN Status</b> | <b>IC50 (uM)</b>    |
| WM164            | V600E                            | MU                | WT                 | 1.34                |
| A375             | V600E (HOMOZ)                    | WT                | WT                 | 1.55                |
| WM88             | V600E                            | WT                | WT                 | 1.83                |
| SKMEL28          | V600E (HOMOZ)                    | MU                | MU                 | 2.55                |
| WM793            | V600E                            | WT                | MU/HEM DEL         | 4.35                |
| SKMEL5           | V600E                            | WT                | WT                 | 5.42                |
| WM2664           | V600D                            | WT                | HEM DEL            | 5.49                |
| WM983B           | V600E                            | MU                | WT                 | 12.6                |
| WM115            | V600D                            | WT                | HEM DEL            | 13.7                |
| A2058            | V600E                            | MU                | MU                 | 38.3                |

Table Legend:

Cell Line mutation information from WISTAR Institute website, COSMIC website, and and Birgit Schitteck, et al., Int J. of Cancer; 82, 583-585 (1999)

Supplemental Figure S1

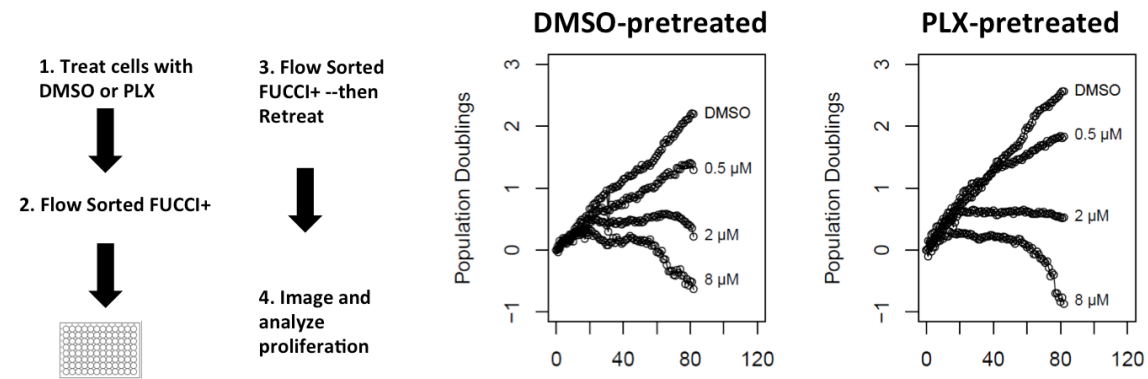

Figure Legend:

Schematic outlines the flow of the experimental design: the cells are pre-treated for 72 hours with either DMSO or PLX4720, then flow sorted for positive fluorescence-ubiquitin-linked cell cycle indicator (FUCCI). Those cells were seed in 96 well plates overnight, then retreated with PLX4720. The proliferation was log-2 normalized and plotted as population doubling (y-axis) over time (x-axis, in hours). The cell line used was A375.

Supplemental Figure S2

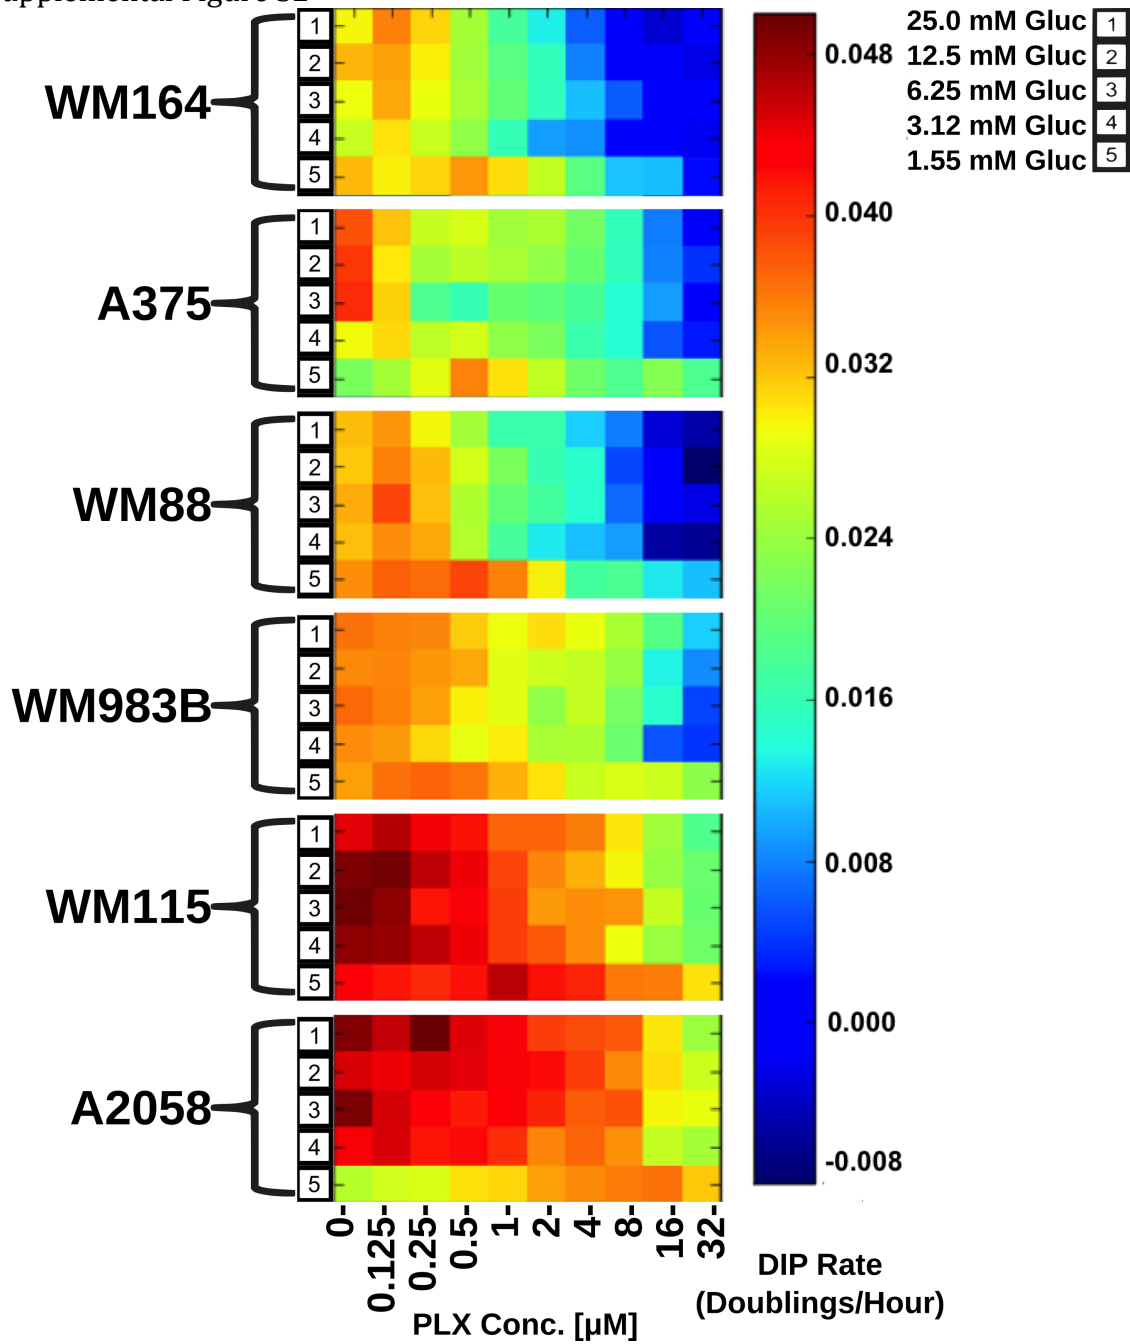

Figure Legend:

Un-scaled heatmap of the proliferative responses of cell lines treated in PLX4720 dose-response assay coupled with varying glucose concentrations (indicated in legend, 5 glucose/media conditions total). The doses of PLX4720 are the x-axis (10 doses, from 32  $\mu\text{M}$  to zero/DMSO) and concentrations of glucose are the y-axis (from 25 mM to 1.55 mM, labeled using legend key).

Supplemental Figure S3

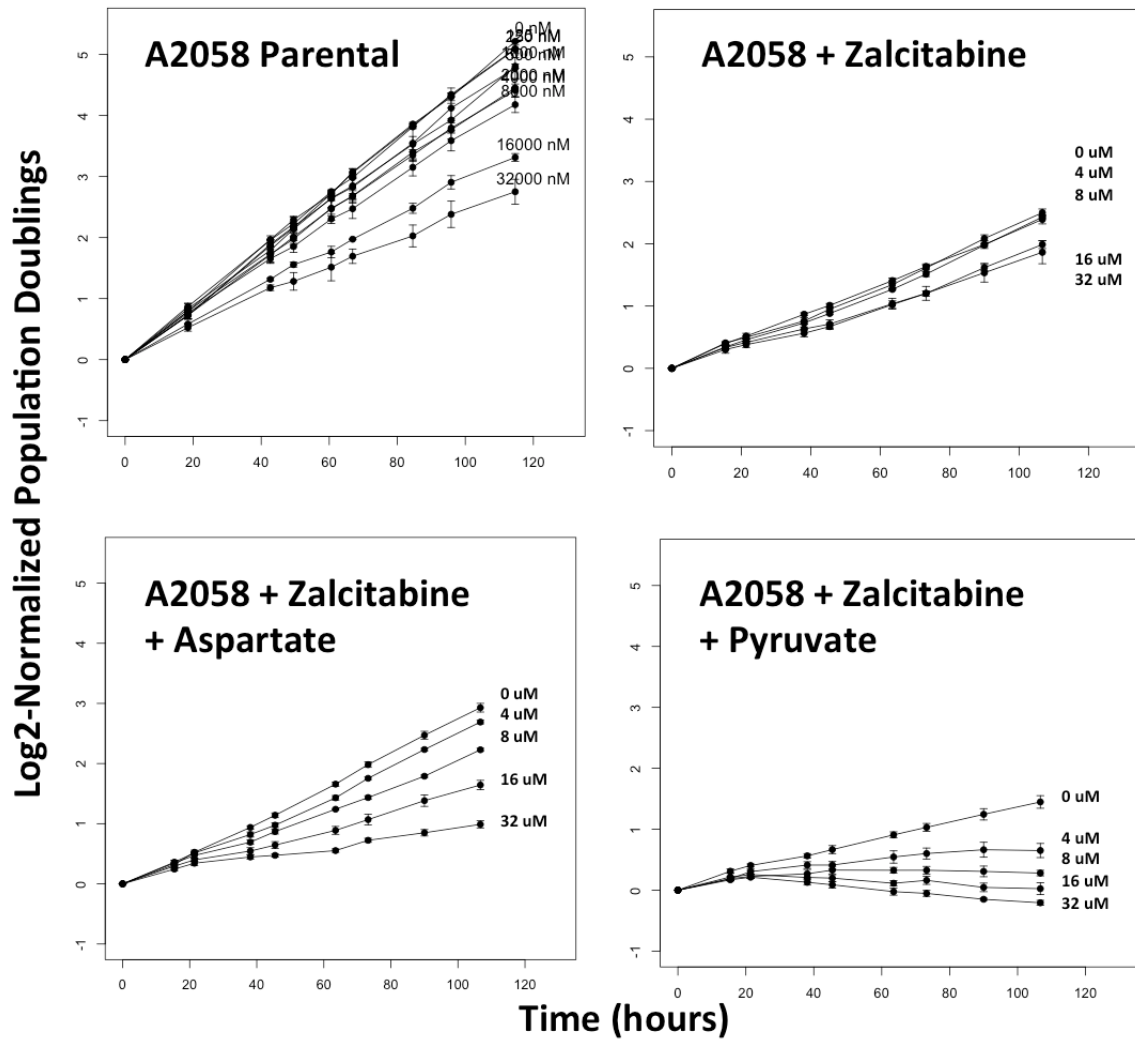

Figure Legend:

Log2-normalized proliferation of parental A2058 (top left plot) and pre-treated ddC/zalcitabine A2058 (remaining 3 plots, pre-treated with 40uM of zalcitabine for ~5 days). 10 mM Aspartate (bottom left) or 10 mM Sodium Pyruvate (bottom right) was added to the medium.

Supplemental Figure S4

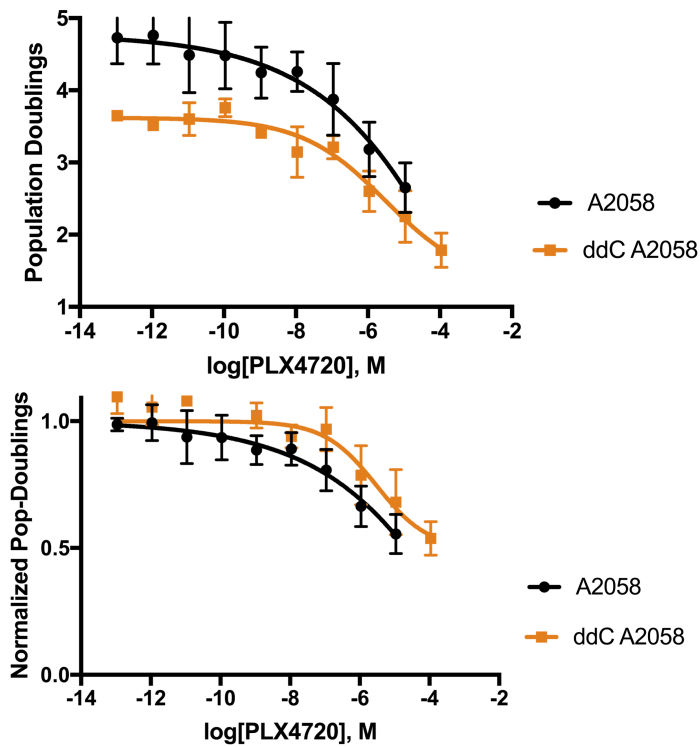

Figure Legend:

Non-normalized (upper panel) and normalized (lower panel) dose-response curves of A2058 parental and A2058 pre-treated with ddC.

Supplemental Matlab Code for PCA Analysis:

Code is available in the public repository in GitHub:

[https://github.com/hardemkn/Hardeman\\_et\\_al\\_2016](https://github.com/hardemkn/Hardeman_et_al_2016)
